1 **Individual susceptibility to TMS affirms the precuneal role in meta-**  
2 **memory upon recollection**

3

4 **Qun Ye<sup>1</sup>, Futing Zou<sup>1</sup>, Michael Dayan<sup>4</sup>, Hakwan Lau<sup>5, 6, 7, 8</sup>, Yi Hu<sup>1</sup> and Sze Chai Kwok<sup>1, 2, 3\*</sup>**

5

6 <sup>1</sup> *Shanghai Key Laboratory of Brain Functional Genomics, Key Laboratory of Brain Functional*  
7 *Genomics Ministry of Education, School of Psychology and Cognitive Science, East China Normal*  
8 *University, Shanghai 200062, China*

9 <sup>2</sup> *Shanghai Key Laboratory of Magnetic Resonance, East China Normal University, Shanghai 200062,*  
10 *China*

11 <sup>3</sup> *NYU-ECNU Institute of Brain and Cognitive Science at NYU Shanghai, Shanghai 200062, China*

12 <sup>4</sup> *Pattern Analysis and Computer Vision, Istituto Italiano di Tecnologia, Genova, Italy*

13 <sup>5</sup> *Department of Psychology, University of California-Los Angeles, Los Angeles, California, 90095,*  
14 *United States*

15 <sup>6</sup> *Brain Research Institute, University of California-Los Angeles, Los Angeles, California, 90095,*  
16 *United States*

17 <sup>7</sup> *Department of Psychology, University of Hong Kong, Hong Kong*

18 <sup>8</sup> *State Key Laboratory for Brain and Cognitive Sciences, University of Hong Kong, Hong Kong*

19

20 \*Correspondence: [sze-chai.kwok@st-hughs.oxon.org](mailto:sze-chai.kwok@st-hughs.oxon.org) (Sze Chai Kwok)

21 Room 269, Geography Building, 3663 Zhongshan Road North, Shanghai 200062, China.

22

23 **Abstract**

24 *Background:* A recent virtual-lesion study using inhibitory repetitive transcranial magnetic  
25 stimulation (rTMS) confirmed the causal behavioral relevance of the precuneus in the  
26 evaluation of one's own memory performance (aka mnemonic metacognition).

27 *Objective:* This study's goal is to elucidate how these TMS-induced neuromodulatory effects  
28 might relate to the neural correlates and be modulated by individual anatomical profiles in  
29 relation to meta-memory.

30 *Methods:* In a within-subjects design, we assessed the impact of 20-min rTMS over the  
31 precuneus, compared to the vertex, across three magnetic resonance imaging (MRI) neuro-  
32 profiles on 18 healthy subjects during a memory versus a perceptual task.

33 *Results:* Task-based functional MRI revealed that BOLD signal magnitude in the precuneus is  
34 associated with variation in individual meta-memory efficiency, and such correlation  
35 diminished significantly following TMS targeted at the precuneus. Moreover, individuals  
36 with higher resting-state functional connectivity (rs-fcMRI) between the precuneus and the  
37 hippocampus, or smaller grey matter volume in the stimulated precuneal region exhibit  
38 considerably higher vulnerability to the TMS effect. These effects were not observed in the  
39 perceptual domain.

40 *Conclusion:* We provide compelling evidence in outlining a possible circuit encompassing the  
41 precuneus and its mnemonic midbrain neighbor the hippocampus at the service of realizing  
42 our meta-awareness during memory recollection of episodic details.

43

44 *Keywords:* Transcranial magnetic stimulation, magnetic resonance imaging, posterior parietal  
45 cortex, metacognition, episodic memory

46

47 *Highlights:*

- 48 ● TMS on precuneus reduces meta-memory ability during memory retrieval.
- 49 ● TMS disrupts the correlation between BOLD activity and meta-memory ability.
- 50 ● TMS effect is modulated by rs-fcMRI between precuneus and hippocampus.
- 51 ● Individuals with greater precuneal grey matter volume more immune to TMS effect.

52

## 53 **Introduction**

54       The ability to accurately monitor and evaluate one's own behavioral performance is a  
55 critical feature of our cognitive function. Recent studies have advanced our understanding of  
56 the neural underpinnings of metacognitive ability, mainly with a focus on the perception and  
57 memory domains. While ample neuroimaging and neuropsychological evidence from distinct  
58 modalities convergently point to the anterior prefrontal cortex (aPFC) being specifically  
59 related to perceptual metacognition, including white matter (WM) fiber tracking [1],  
60 microstructural measures of WM concentration [2], grey matter (GM) volume [1, 3], task-  
61 related functional magnetic resonance imaging (fMRI) [4-7], resting-state fMRI [8],  
62 neurophysiology [9, 10], and lesion-based studies [11-13], our understanding of the neural  
63 correlates of metacognition for memory is in contrast less conclusive.

64       Researchers have used a combination of objective memory task accuracy (usually from  
65 recognition or forced-choice tasks, known as type 1 tasks) and subsequent subjective  
66 confidence rating (type 2 tasks) to define successful decision making [14], and have found the  
67 memory-related signals and the confidence-related signals can diverge and might rely on two  
68 largely independent processes [15]. Neurally, other investigations have implicated the  
69 posterior parietal cortex in the subjective experiences and mnemonic metacognition of  
70 memory contents [16]. Most notably, patients with lesions on the posterior parietal cortex  
71 tend to show less confidence in their source recollection even though their type 1 task appears  
72 to be executed as well as healthy controls [16, 17], implying a critical role of the parietal  
73 cortex in mnemonic metacognition [18]. It has also been shown that the medial parietal cortex  
74 was particularly activated during confidence rating in memory tasks [6, 19] and that  
75 individual differences in mnemonic metacognition ability to be correlated with resting-state  
76 connectivity between the aPFC and the right precuneus [8], as well as with variation in the  
77 volume of the precuneus [3].

78       In a previous paper [18], we have confirmed the causal relevance of the precuneus in  
79 mnemonic metacognition via inhibiting the normal functioning of the precuneus temporarily

80 with non-invasive low-frequency repetitive transcranial magnetic stimulation (1-Hz rTMS).  
81 However, we have not been able to characterize the individual neural variability affected by  
82 the neuromodulatory effects of the TMS on this critical region for this metacognitive process.  
83 Hence, here we tried to capitalize on the individual neural variability in combination of TMS  
84 to elucidate the neural correlates of meta-memory using both functional and structural data.

85 Our experimental protocol utilized data from subjects' resting-state functional MRI,  
86 structural MRI, and two task-based functional MRI following stimulation on a target region,  
87 the precuneus, or a control region, the vertex. We analyzed the resting-state functional  
88 connectivity, voxel-based morphometry (VBM), and blood oxygen level dependent (BOLD)  
89 activity by specifically comparing the putative effects of TMS on the precuneus with a control  
90 stimulation condition. Our results provided a comprehensive profile to characterize the  
91 neuromodulatory effects by the focal magnetic stimulation on the precuneus across subjects  
92 through the three different MRI analyses, and corroborated previous findings on the  
93 contribution made by the precuneus in supporting mnemonic metacognition [3, 18].

## 94 **Material and methods**

### 95 *Participants*

96 Participants were recruited from the student community of the East China Normal  
97 University and were compensated for their participation. Data came from 18 healthy adults (7  
98 females; age 19-24 years). Each of them participated in two experiments, each including two  
99 TMS sessions, giving us a within-subjects comparison. No subjects withdrew due to  
100 complications from the TMS procedures, and no negative treatment responses were observed.  
101 The number of participants was decided based on previous work adopting a similar  
102 experimental design [20]. All participants had normal or corrected-to-normal vision, no  
103 reported history of neurological disease, no other contraindications for MRI or TMS, and all  
104 gave written informed consent. The study was approved by University Committee on Human  
105 Research Protection of East China Normal University (UHRP-ECNU).

106 *Overview of study*

107 Participants initially underwent a high-resolution structural MRI scan, which was used to  
108 define subject-specific coordinates for subsequent sites of TMS and voxel-based  
109 morphometry analysis and undertook a 7 min of resting-state fMRI scan, which was used for  
110 subsequent functional connectivity analysis. The participants were asked to complete two  
111 experimental sessions of a memory task. For each session of the memory part, participants  
112 needed to play one video game (encoding phase, out of MRI scanner), and received 20 min of  
113 rTMS (rTMS stimulation phase) before going to complete the memory retrieval task  
114 conducted in MRI scanner (memory retrieval phase). The chapters of the video game and the  
115 stimulation sites were counterbalanced across the two sessions (Figure 1A). The same  
116 participants also participated in a perceptual experiment outside the scanner for task  
117 comparison purpose.

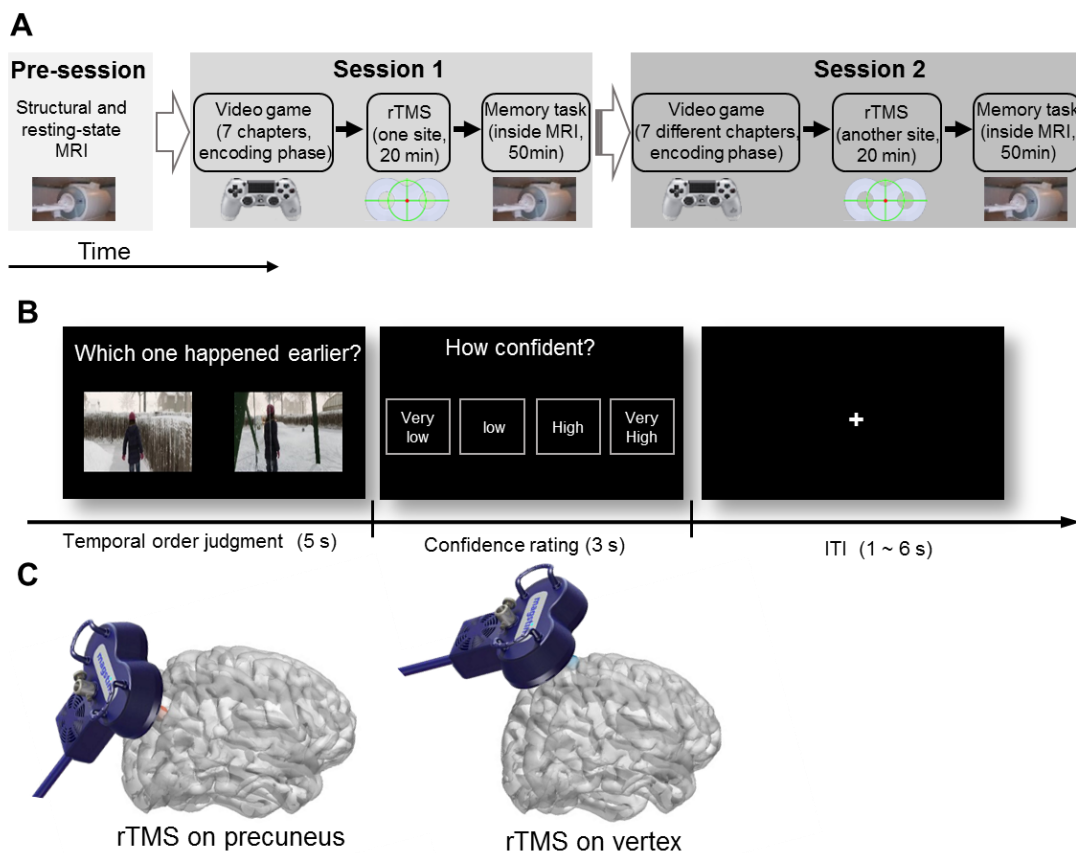

118

119 **Figure 1.** (A) Experiment overview. Participants underwent structural and resting-state MRI

120 scans during the pre-session. In session 1 and session 2, participants played a video game  
121 containing seven related chapters, and 24 hours later, received 20 min of repetitive  
122 transcranial magnetic stimulation (rTMS) to either one of two cortical sites before performing  
123 a memory retrieval task during MRI. The two sessions were conducted within-subjects on two  
124 different days. (B) Temporal order memory retrieval task. Participants chose the image that  
125 happened earlier in the videoplay they had played and reported their confidence rating on how  
126 confident their judgment was correct, from very low to very high. (C) TMS to stimulation  
127 sites. Location of precuneus (target site, MNI coordinates: x, y, z = 6, -70, 44) is depicted  
128 with a red dot (left) and vertex with a blue dot (right).

### 129 *Stimuli*

130 The stimuli were extracted from an action-adventure video game (*Beyond: Two Souls*,  
131 Quantic Dream, France; PlayStation 4 version, Sony Computer Entertainment.). The  
132 Participants played 14 chapters in total across two sessions: 7 in session 1 and then another 7  
133 in session 2. These subject-specific videos were recorded and were used for extraction of still  
134 images in both sessions.

135 For the memory task, we selected still frames/images from the subject-specific recorded  
136 videos in which participants had played the day before. Each second in the video consisted of  
137 29.97 static images. In each game-playing session, 240 pairs of images were extracted from  
138 the 7 chapters and were paired up for the task based on the following criteria: (1) the two  
139 images had to be extracted from either the same chapters or adjacent chapters (Within- vs.  
140 Across-chapter condition); (2) the temporal distance (TD) between the two images were  
141 matched between Within- and Across-chapter condition; (3) in order to maximize the range of  
142 TD, we first selected the second longest chapter of the video and determined the longest TD  
143 according to a power function (power = 1.5). We generated 60 progressive levels of TD  
144 among these pairs. For the perceptual task, we used the same set of subject-specific stimuli  
145 generated for the memory task to rule out any potential stimuli idiosyncrasy. The resolution of  
146 one of the paired images was changed using Python Imaging Library by resizing the image to

147 modulate the pixel dimension; this modification of image resolution was conducted for an  
148 image-resolution comparison task (see below).

149 *TMS: sites, protocol, and procedure*

150 Repetitive transcranial magnetic stimulation (rTMS) was applied using a Magstim  
151 Rapid<sup>2</sup> magnetic stimulator connected with a 70mm double air film coil (The Magstim  
152 Company, Ltd., Whitland, UK). The subject-specific structural T1 images were obtained and  
153 used in theBrainsight2.0 (Rogue Research Inc., Montreal, Canada), a neuronavigation system,  
154 coupled with infrared camera using a Polaris Optical Tracking System (Northern Digital,  
155 Waterloo, Canada), to localize the target brain sites. Target stimulation sites were selected in  
156 the system by transformation of the Montreal Neurological Institute (MNI) coordinates to  
157 participant's native brain. The stimulation sites located in the precuneus at the MNI  
158 coordinate x=6, y=-70, z=44 [21], and in a control area on the vertex, which was identified at  
159 the point of the same distance to the left and the right pre-auricular, and of the same distance  
160 to the nasion and theinion (Figure 1C). To prepare the subject-image registration and  
161 promote on-line processing of the neuronavigation system, four location information of each  
162 subject's head were obtained manually by touching fiducial points, which are the tip of the  
163 nose, the nasion, and the inter-tragal notch of each ear using an infrared pointer.

164 In each session, rTMS was delivered to either the precuneus or vertex site before the  
165 participants engaged in performing the memory/perceptual tasks. rTMS was applied at low-  
166 frequency for a continuous duration of 20 min (1 Hz, 1,200 pulses in total) at 110% of active  
167 motor threshold (MT), which was defined as the lowest TMS intensity delivered over the  
168 motor cortex necessary to elicit visible twitches of the right index finger in at least 5 out of 10  
169 consecutive pulses. The MT was measured prior to administering the stimulation (MT range:  
170 57% - 80%; mean  $\pm$  sd: 68.28%  $\pm$  6.19%). During stimulation, participants wore earplugs to  
171 attenuate the sound of the stimulating coil discharge. The coil was held to the scalp of the  
172 participant with a custom coil holder and the subject's head was propped with a comfortable  
173 position. Coil orientation was parallel to the midline with the handle pointing downward.



174 Immediately after the 20 min of rTMS, subjects performed four blocks of memory retrieval  
175 task inside MRI scanner. This particular stimulation magnitude and protocols of rTMS (low-  
176 frequency stimulation of 1 Hz) is known to induce efficacious intracortical inhibitory effects  
177 for over 60 min [22, 23]. Given that each session of the memory/perceptual tasks lasted  
178 approximately 45 min, the TMS effects should have been long-lasting enough for the tasks.  
179 For safety reason and to avoid carry-over effects of rTMS across sessions, session 1 and 2 of  
180 both tasks were conducted on two separate days.

181

182 *Memory task (temporal-order judgment, TOJ), perceptual task (image-resolution judgment),*  
183 *and confidence ratings*

184 The memory retrieval task required participants to choose the image that happened  
185 earlier in the video game they had played one day before (temporal order judgment, TOJ).  
186 The memory retrieval task was administrated inside an MRI scanner, where visual stimuli  
187 were presented using E-prime 2.0 software (Psychology Software Tools, Inc., Pittsburgh, PA),  
188 as back-projected via a mirror system to the participant. Each trial started by a temporal order  
189 judgment in 5 s, and immediately followed by a confidence judgment within 3 s. Participants  
190 performed the temporal order judgment using their index and middle fingers of one of their  
191 hands via an MRI compatible five-button response keyboard (Sinorad, Shenzhen, China), and  
192 reported their confidence level (“Very Low”, “Low”, “High”, or “Very High”) regarding their  
193 own judgment of the correctness of the TOJ with four fingers (thumb was not used) of the  
194 other hand. The left/right hand response contingency was counterbalanced across participants.  
195 Participants were encouraged to report their confidence level in a relative way and make use  
196 of the whole confidence scale. Confidence judgments are one commonly used method for  
197 quantifying the sensitivity of self-reported confidence to objective discrimination  
198 performance under the signal detection theory [24]. These confidence ratings will be used in  
199 our computation for metacognitive indices (see below). Following these judgments, a fixation  
200 cross with a variable duration (1 – 6 s) was presented (Figure 1B). For either of the sessions,

201 there was a practice block for participants to get familiar with the task before going into MRI  
202 scanner. In total, each participant completed 240 trials in either of the sessions (4 blocks  $\times$  60  
203 trials).

204 The perceptual task required participants to choose either the clearer (or blurrier, counter-  
205 balanced across participants) image among a pair of images on each trial. An identical  
206 confidence rating procedure as of the memory task was adopted immediately following each  
207 image-resolution comparison judgment. Each participant completed 240 perceptual  
208 discrimination trials in each of the two sessions.

#### 209 *MRI data acquisition*

210 All the participants were scanned in a 3-Tesla Siemens Trio magnetic resonance imaging  
211 scanner using a 32-channel head coil (Siemens Medical Solutions, Erlangen, Germany). A  
212 total of 1,350 fMRI volumes and 220 rs-fMRI volumes were acquired for each subject. The  
213 functional images were acquired with the following sequence: TR = 2000 ms, TE = 30 ms,  
214 field of view (FOV) = 230  $\times$  230 mm, flip angle = 70°, voxel size = 3.6  $\times$  3.6  $\times$  4 mm, 33  
215 slices, scan orientation parallel to AC-PC plane. High-resolution T1-weighted MPRAGE  
216 anatomy images were also acquired (TR = 2530 ms, TE = 2.34 ms, TI = 1100 ms, flip angle =  
217 7°, FOV = 256  $\times$  256 mm, 192 sagittal slices, 0.9 mm thickness, voxel size = 1  $\times$  1  $\times$  1 mm).

#### 218 *Data analysis*

##### 219 *Behavioral data analysis*

220 We evaluated the metacognitive ability by Meta-d' using both memory performance and  
221 confidence ratings data. Meta-d' quantifies metacognitive sensitivity (the ability to  
222 discriminate between one's own correct and incorrect judgments) in a signal detection theory  
223 (SDT) framework. Meta-d' is widely used as a measure of metacognitive capacity and  
224 expressed in the same units as d', so the type 2 sensitivity (meta-d') can be compared with the  
225 type 1 sensitivity (d') directly [14, 24]. If meta-d' equals to d', the participant makes

226 confidence rating with maximum possible metacognitive sensitivity. If meta-d' less than d',  
227 the participant's metacognitive sensitivity is suboptimal. Here, we calculated the logarithm of  
228 the ratio meta-d'/d' (log M-ratio) for estimating the metacognitive efficiency (the level of  
229 metacognitive sensitivity given a particular level of performance capacity). The toolbox for  
230 the SDT-based meta-d' estimation was available at  
231 <http://www.columbia.edu/~bsm2105/type2sdt/>.

232 In order to ensure our results were not due to any idiosyncratic violation of the  
233 assumptions of SDT, we additionally calculated the phi coefficient index, which does not  
234 make these parametric assumptions [14]. Rather, it evaluates how roughly “advantageously”  
235 each trial was assigned for high or low confidence based on performance in the preceding  
236 cognitive judgment, reflecting the association between the two binary variables [25]. The  
237 coefficient was calculated by the following equation using the number of trials classified in  
238 each case [n(case)]:

$$239 \quad \text{phi coefficient } (\Phi) = \frac{n(\text{Correct High}) \times n(\text{Incorrect Low}) - n(\text{Correct Low}) \times n(\text{Incorrect High})}{\sqrt{n(\text{Correct}) \times n(\text{Incorrect}) \times n(\text{High}) \times n(\text{Low})}}$$

240 Trials missing either one of the measures (memory: 2.9% of TOJ trials, 2.2% confidence  
241 rating; perception: 0.7% of perceptual trials) were excluded from the analyses. The 4-point  
242 confidence ratings were collapsed into two categories (high vs. low) for analyses.

### 243 *Task-based fMRI data analysis*

244 Preprocessing was conducted using SPM12 (<http://www.fil.ion.ac.uk/spm>). Scans were  
245 realigned to the middle EPI image. The structural image was co-registered to the mean  
246 functional image, and the parameters from the segmentation of the structural image were used  
247 to normalize the functional images that were resampled to 3 × 3 × 3 mm. The realigned  
248 normalized images were then smoothed with a Gaussian kernel of 8-mm full-width half  
249 maximum (FWHM) to conform to the assumptions of random field theory and improve  
250 sensitivity for group analyses. Data were analyzed using general linear models as described  
251 below with a high-pass filter cutoff of 256 s and autoregressive AR(1) model correction for

252 auto-correlation.

253 To identify brain areas in processing metacognitive information, we performed a contrast  
254  $[(\text{Correct\_High} - \text{Correct\_Low}) > (\text{Incorrect\_High} - \text{Incorrect\_Low})]$  at onsets of the  
255 memory phase with a duration of 5 s at single-subject level, including the following  
256 regressors: memory conditions (Correct, Incorrect, Miss)  $\times$  confidence rating conditions  
257 (High, Low, Miss). Each run consisted of 6 head realignment parameters and the run mean  
258 were included as parameters of no interest. These events were modeled with a canonical  
259 hemodynamic response function as an event-related response. To test the relationship  
260 between the BOLD response and the behavioral meta-memory index (log M-ratio) across  
261 subjects, single-subject contrast images were entered into a second-level random effects  
262 analysis using one-sample  $t$  tests with log M-ratio as a covariate separately for two TMS  
263 sessions (TMS-precuneus vs. TMS-vertex).

264 The activation clusters were defined by the peak voxels on the normalized structural  
265 images and labeled using the nomenclature of Talairach and Tournoux (1988) [26]. Only  
266 activation surviving multiple correction at the cluster-level FWE corrected  $p < 0.05$  threshold  
267 are reported below.

#### 268 *Resting-state functional connectivity analysis*

269 A functional brain network was defined by a symmetric functional connectivity matrix  
270  $c=c(i,j)$ , where each row(i)/column(j) of the matrix is a network node, and each matrix entry  
271  $c(i,j)$  is the weight of the network edge between node  $i$  and  $j$ . The connectivity matrices were  
272 obtained through a series of preprocessing steps on both rs-fMRI and T1 data, implemented in  
273 Python using a combination of fmriprep [27], nipy [28] and networkx packages  
274 (<https://networkx.github.io/>).

275 T1 preprocessing consisted in correcting for bias field using N4 [29], skull-stripping with  
276 ANTs (<http://stnava.github.io/ANTs/>), tissue segmentation into WM, GM and cerebral spinal  
277 fluid (CSF) with FSL (<https://fsl.fmrib.ox.ac.uk/fsl/fslwiki>) FAST, and non-linear registration  
278 to MNI space with ANTs. FreeSurfer (<https://surfer.nmr.mgh.harvard.edu/>) was used to

279 reconstruct the GM and WM surfaces of each subject using the brain mask previously  
280 calculated, and to parcellate the brain into 86 regions as per the Desikan-Killiany atlas.

281 Resting-state preprocessing consisted in slice-time corrections with AFNI  
282 (<https://afni.nimh.nih.gov/>) 3dTShift, motion corrections with FSL MCFLIRT, and  
283 registration to the subject native T1 volume with FreeSurfer boundary based registration  
284 (using 9 degrees of freedom). ICA-based Automatic Removal of Motion Artifacts (AROMA)  
285 [30] was then applied to estimate noise regressors, while physiological noise regressors were  
286 calculated from voxels in the WM and CSF masks computed previously. The data was  
287 smoothed with an 8-mm kernel excluding background voxels with FSL Susan toolbox and all  
288 the noise components regressed out using FSL regfilt. Finally, bandpass filtering between  
289 0.008 and 0.08 Hz was implemented with AFNI. Linear detrending was included in the  
290 previous step by adding a linear sequence as additional regressor. The FreeSurfer atlas was  
291 resampled to resting-state resolution, and the connectivity matrix calculated from the  
292 correlation of the denoised signal between each pair of atlas regions. Finally, the connectivity  
293 matrix entries were Fisher transformed. To remove spurious edges while ensuring consistent  
294 edge density across subjects, a lenient wiring cost of 50% was applied to all connectivity  
295 matrices which thus had half the total number of possible edges.

296 The edge length  $l(i,j)$  between two nodes was defined as the absolute inverse of the  
297 associated weight  $c(i,j)$ , so that strong (i.e., high) correlation corresponded to short (i.e., low)  
298 length. We investigated in each hemisphere the hippocampus-precuneus (HP) connectivity  
299 distance which was defined as the shortest path length between these two nodes (computed  
300 using Dijkstra's method) [31], that is the smallest sum of edge lengths among all the possible  
301 paths connecting them. The resulting HP connectivity distance was averaged across  
302 hemispheres.

### 303 *Voxel-based morphometry (VBM) analysis*

304 VBM preprocessing was performed using SPM12 (<http://www.fil.ion.ucl.ac.uk/spm>).  
305 Following the similar protocol used in previous studies [1, 3], the structural images were first

306 segmented into GM, WM and CSF in native space. For increasing the accuracy of inter-  
307 subject alignment, the GM images were aligned and wrapped to an iteratively improved  
308 template using DARTEL algorithm, while simultaneously aligning the WM images [32]. The  
309 DARTEL template was then normalized to MNI stereotactic space, and then GM images were  
310 modulated in a way that their local tissue volumes were preserved. Finally, images were  
311 smoothed using an 8 mm full-width at half maximum isotropic Gaussian kernel.

312 The pre-processed images were analyzed in a multiple regression model to examine the  
313 relation between GM volume and difference in metacognitive efficiency between two TMS  
314 sessions (TMS-precuneus > TMS-vertex). Proportional scaling was used to account for  
315 volume variability in total intracranial volume across participants. A binary GM mask (> 0.3)  
316 was used to exclude clusters outside the brain and limit the search volume to voxels likely to  
317 contain GM.

318 We examined the positive and negative t-maps separately and identified clusters using an  
319 uncorrected threshold of  $p < 0.001$  at voxel-level. These clusters were used to define regions  
320 of interest using MarsBar version 0.44 software (<http://marsbar.sourceforge.net/>). Following  
321 McCurdy et al. (2013)'s protocol [3], small-volume correction (SVC) was applied on a cluster  
322 of interest by centering a 10-mm sphere over the targeted site of stimulation in the precuneus  
323 (MNI: x=6, y=-70, z=44).

## 324 **Results**

### 325 *Behavioral results*

326 We first tested the hypothesis that TMS to the precuneus would reduce individual  
327 metacognitive ability in the memory task. There was a trend reduction in individual  
328 metacognitive efficiency in the TMS-precuneus session compared to the TMS-vertex session  
329 (Log M-ratio: paired t-test  $t(17) = 1.63$ , one-tailed  $p = 0.061$ ). The trend was replicated with  
330 a SDT assumption free correlation measure computed by the association between the task  
331 performances and subsequent confidence ratings (*Phi* correlation:  $t(17) = 1.68$ , one-tailed  $p =$

332 0.055), and was confirmed by using another metacognitive efficiency measure, Meta- $d' - d'$ ,  
333 in our previous paper [18]. Moreover, we ascertained that there were no significant  
334 differences in task performance and levels of confidence rating between the two TMS  
335 sessions (accuracy: paired t-test  $t(17) = 0.349$ ,  $p = 0.640$ ; confidence rating:  $t(17) = 0.070$ ,  $p$   
336  $= 0.780$ ). These results indicate that TMS to the precuneus specifically affected the individual  
337 metacognitive ability, and that no detectable effect related to their basic memory performance  
338 could be found.  
339

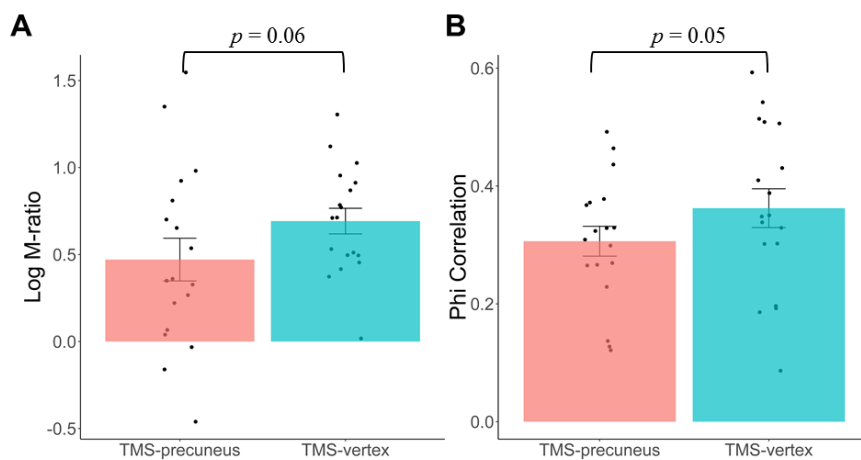

340  
341 **Figure 2.** Effects of TMS on meta-memory efficiency. Metacognitive ability was reduced  
342 after TMS to precuneus compared to TMS to vertex in (A) SDT metacognitive efficiency  
343 measure (Log M-ratio) and (B) Phi coefficient. Black dots denote metacognitive score per  
344 subject. Error bars denote the standard error of the mean (SEM) over participants.

#### 345 *Task-based fMRI analysis*

346 To test the effect of TMS on task-based BOLD responses, we correlated the interaction  
347 term  $[(\text{Correct\_High} - \text{Correct\_Low}) > (\text{Incorrect\_High} - \text{Incorrect\_Low})]$  (i.e., difference in  
348 activation between correct vs. incorrect trials under high vs. low confidence) with log M-ratio  
349 index across subjects separately for TMS-vertex and TMS-precuneus sessions and compared  
350 the BOLD level of the interaction term between the two sessions. In the TMS-vertex session,  
351 there was a significant positive correlation between metacognitive efficiency and brain

352 activation in one posterior cluster ( $k = 327$  voxels, Figure 3A), extending from the precuneus  
353 (peak voxel,  $x, y, z = 6, -48, 14$ ) to the posterior cingulate cortex (peak voxel,  $x, y, z = -3, -42,$   
354  $14$ ). No significant correlation between metacognitive efficiency and brain activation was  
355 found in the TMS-precuneus session. Note that there was no difference in the overall BOLD  
356 activation level indicated by the interaction term between the two TMS sessions (paired t-test  
357  $t(17) = 0.44, p = 0.667$ ). However, to further unpack these results, the activation cluster in  
358 TMS-vertex session was saved as a mask and we plotted the relationship between  
359 metacognitive efficiency and BOLD response separately for TMS-vertex and TMS-precuneus  
360 sessions. While the metacognitive efficiency was significantly correlated with the BOLD  
361 response in the TMS-vertex session (Pearson's  $r = 0.76, p < 0.001$ ), such correlational pattern  
362 was not observed in the TMS-precuneus session any more (Pearson's  $r = 0.18, p = 0.475$ ).  
363 The correlation coefficient was significantly lower than that of the TMS-vertex session  
364 (comparison between correlations:  $z = 2.36, p = 0.019$ ; Figure 3B).

365 In order to fully characterize this BOLD-behavior relationship in the TMS-vertex session,  
366 we divided the volunteers into two subgroups using median split of meta-memory efficiency  
367 score (HIGH vs. LOW meta-memory efficiency subgroup;  $n = 9$  each) and ran a three-way  
368 mixed ANOVA (Accuracy: Correct/Incorrect  $\times$  Confidence: High/Low  $\times$  Group: HIGH/LOW)  
369 on the individual BOLD response extracted with the aforementioned mask. We found a  
370 significant main effect of Confidence ( $F(1,16) = 8.93, p = 0.008$ ) and a marginally significant  
371 three-way interaction ( $F(1,16) = 4.33, p = 0.054$ , Figure 3C), which was driven by a  
372 significant difference between high confidence vs. low confidence rating for correct trials in  
373 the HIGH meta-memory efficiency subgroup ( $F(1,8) = 10.14, p = 0.012$ ) and its  
374 corresponding absence in the LOW meta-memory efficiency subgroup ( $F(1,8) = 0.16, p =$   
375  $0.698$ ). Following TMS administered to the precuneus, all these effects were not observed at  
376 all (all  $ps > 0.05$ ). By taking individual variability in BOLD activation into account, the  
377 functional relevance of the precuneus in meta-memory efficiency is well evinced.



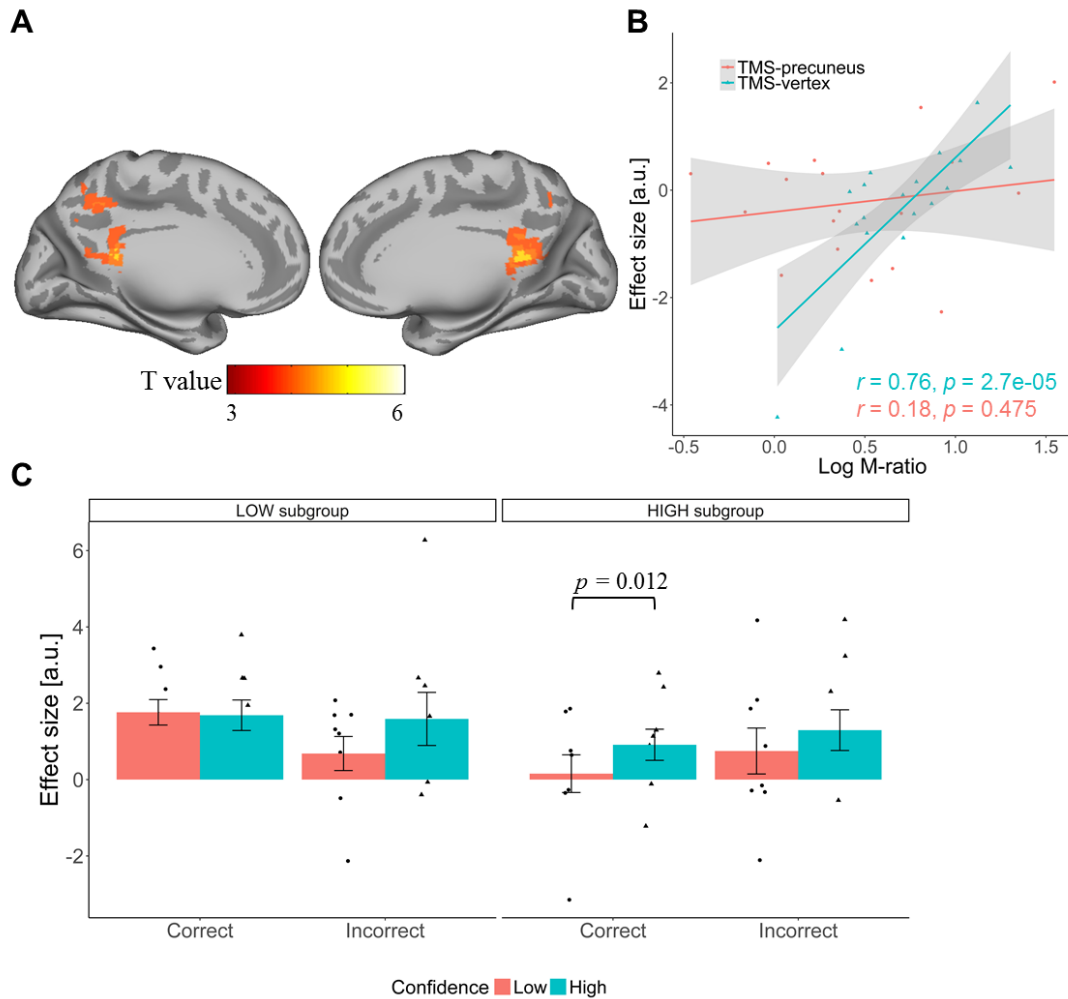

378

379 **Figure 3.** (A) Significant positive correlation between meta-memory efficiency (Log M-ratio)  
380 and activation in posterior medial region (peak voxel in precuneus:  $x, y, z = 6, -48, 14$ ) in the  
381 TMS-vertex session. For visualization purposes, the threshold was set at voxel-level  $p < 0.005$   
382 uncorrected. (B) Individuals activation level (arbitrary unit, a.u.) in the precuneal cluster is  
383 correlated with meta-memory efficiency (Log M-ratio) only in the TMS-vertex session (cyan  
384 line) but not in the TMS-precuneus session (red line). Grey regions indicate 95% confidence  
385 intervals. (C) A three-way mixed ANOVA (Accuracy  $\times$  Confidence  $\times$  Group) on BOLD  
386 response in the TMS-vertex session, with individual data points superimposed on the bar plot.  
387 Error bars denote the standard error of the mean (SEM) over participants.

388

389 *Resting-state functional connectivity analysis (rs-fcMRI)*

390 In addition to task-based BOLD responses, recent works have also identified single-  
391 neuron responses in the human posterior parietal cortex which appear to code recognition  
392 confidence [15], and suggested a stream that reads out meta-memory from the hippocampus  
393 in nonhuman primates [25, 33]. In order to measure information communication from  
394 distributed brain regions, we estimated the measure of functional integration between  
395 precuneus and hippocampus (HP distance) over resting-state BOLD response. To aid  
396 interpretation, the shorter the HP distance is, the stronger functional integration between  
397 precuneus and hippocampus (Figure 4A).

398 We investigated the effect of TMS on the association between HP distance and the  
399 change in meta-memory efficiency with a linear regression model, and a significant positive  
400 correlation was found (Pearson's  $r = 0.49$ ,  $p = 0.037$ , Figure 4B). Individuals with higher  
401 functional connectivity between precuneus and hippocampus showed higher vulnerability  
402 after TMS to the precuneus, compared to the vertex (TMS-precuneus > TMS-vertex). In order  
403 to show such effects to be specific to the memory domain, we also ran this correlational  
404 analysis with the change in metacognitive efficiency obtained from the perceptual task and  
405 found no relationship between HP distance and meta-perceptual efficiency (Pearson's  $r = -$   
406  $0.36$ ,  $p = 0.143$ ); the two correlation coefficients were significantly different from each other  
407 (comparison between correlations:  $z = 3.27$ ,  $p = 0.001$ ).

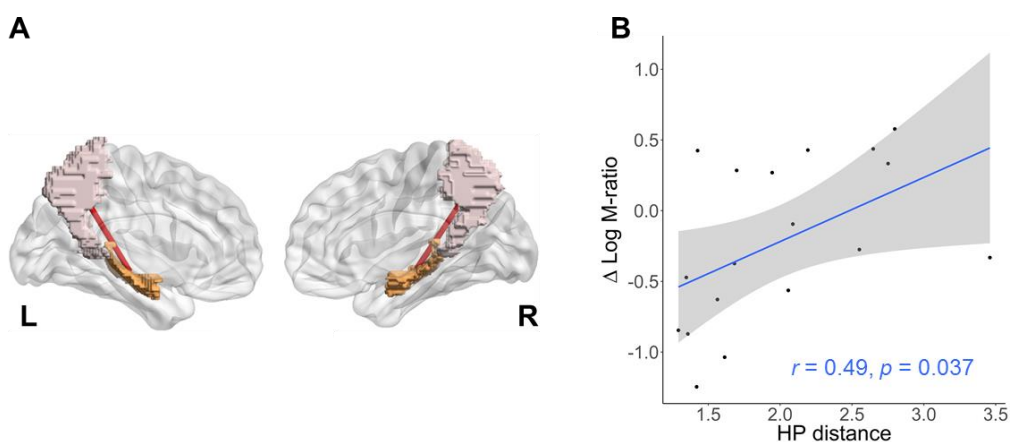

408

409 **Figure 4:** (A) A cartoon image to show hippocampus-precuneus (HP) connectivity distance

410 between hippocampus (orange color) and precuneus (pink color) separately for left- and right-  
411 hemisphere. The resulting HP distance was averaged across hemispheres. (B) Scatter plot  
412 between HP distance and the change in metacognitive efficiency (TMS-precuneus > TMS-  
413 vertex), with 95% confidence intervals.

#### 414 *Voxel-based morphometry (VBM) analysis*

415 Having observed that metacognitive ability was reduced by TMS to precuneus than to  
416 vertex, we then asked whether this inhibitory effect of TMS was predicted by variability in  
417 grey matter volume (GMV) in the precuneus across subjects. We investigated the association  
418 between GM volume and the change in meta-memory efficiency (TMS-precuneus > TMS-  
419 vertex) after controlling for total brain volume and gender (male/female). The results showed  
420 that change in meta-memory efficiency was positively correlated with GMV in the precuneus  
421 ( $t = 3.75$ , SVC- $P_{FWE} < 0.05$  at  $x, y, z = 15, -68, 43$ ; Figure 5A). We also ran the same analysis  
422 on the meta-scores obtained from the perceptual task and no association between precuneal  
423 GMV and change in meta-perceptual efficiency was found, again highlighting the domain-  
424 specificity of our main findings.

425 To visualize this correlation pattern, we plotted the linear relationship between GMV and  
426 change in metacognitive efficiency scores at the peak voxel of this cluster across  
427 participants (Pearson's  $r = 0.86$ ,  $p < 0.001$ ; Figure 5B). These results revealed that participants  
428 with a smaller volume/density in the precuneus tend to have higher vulnerability to TMS in  
429 metacognitive ability, whereas those with a bigger volume/density in this region tend to be  
430 more immune to the TMS disruption.

431 Finally, we ran a control analysis correlating individuals active motor threshold with  
432 his/her delta log M-ratio and showed that the putative effects by TMS on meta-memory  
433 ability was not modulated by the penetrability/thickness of the individuals skull per se  
434 (Pearson's  $r = 0.13$ ,  $p = 0.611$ ), reinforcing our main findings that the neuromodulatory  
435 effects by TMS were specific to the precuneus-related anatomical profiles.

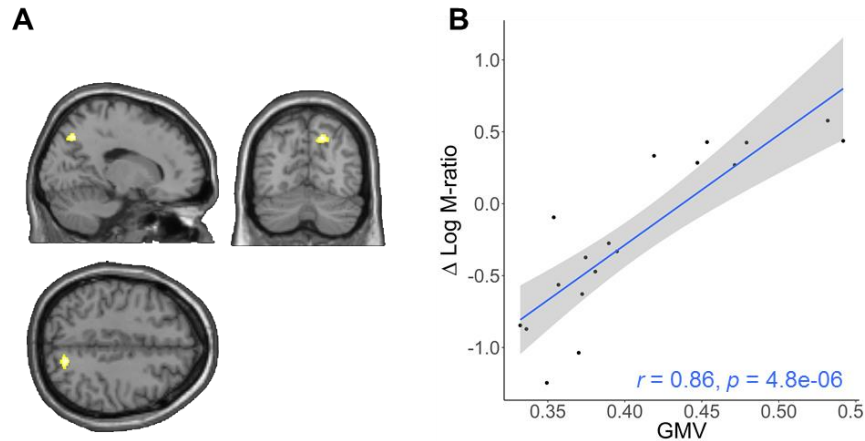

436

437 **Figure 5** (A) Brain regions with positive correlation between grey matter volume (GMV) and  
438 difference in metacognitive efficiency (Log M-ratio in the TMS-precuneus session – Log M-  
439 ratio in the TMS-vertex session). The significant cluster was found in the precuneal region  
440 ( $P_{FWE} < 0.05$  small volume correction). For display purpose, brain maps were thresholded at  $p$   
441  $< 0.005$  uncorrected. (B) Scatter plot between individual GMV from the peak voxel (x, y, z =  
442 15, -68, 43, right precuneus) and their change in metacognitive efficiency, with 95%  
443 confidence intervals.

444

## 445 **Discussion**

446 TMS on the precuneus was found to impair metacognitive efficiency in a long-term  
447 memory retrieval task without affecting type 1 task performance [18]. Despite reaching  
448 statistical significance, the effect size in that study was relatively small as in the effects were  
449 stronger in one measure than the other (i.e., fully statistically significant for Meta-d' – d' but  
450 only marginally significant for Log M-ratio measure). The discrepancy between the two  
451 metrics might be potentially caused by the sizable individual differences among the  
452 participants, as of other reported observations that individual variability imposes sizable  
453 influences on determining the experimental effects of brain stimulation [34]. Here, we set out  
454 to quantify the neuromodulatory effects of TMS making use of individual differences in terms  
455 of BOLD responses and two anatomical profiles. Multimodal characterization as such  
456 illuminated unambiguously the importance of the precuneus in supporting meta-memory upon  
457 episodic recollection.

458 We first established that the precuneal region is functionally implicated in meta-memory  
459 judgement using task-related BOLD signal measurements. In contrast to the findings that  
460 BOLD activities in the right rostro-lateral prefrontal cortex are predictive of meta-perceptual  
461 ability [4], our findings showed an association between BOLD responses in the precuneus and  
462 meta-memory efficiency. Specifically the BOLD responses in the precuneus was correlated  
463 with individuals' metacognitive efficiency in the control session, but such correlation was  
464 disrupted following TMS on the precuneus, pointing to a critical role of the precuneus in  
465 metacognitive ability for memory processes [3, 6, 8]. These results are in line with a recent  
466 report that meta-memory specific signals being located in the precuneus [6] as well as clinical  
467 findings that patients with lesions in the posterior parietal cortex tend to exhibit reduced  
468 confidence in their source recollection [16, 17].

469 A natural question to ask is to what extent and how the precuneus is mechanistically  
470 involved in meta-memory processing. While the overall BOLD level given by the interaction  
471 term was equated across the two TMS sessions at the group level, we showed that TMS to the

472 precuneus considerably weakened the correlation between metacognitive efficiency and brain  
473 activation across subjects. This implies that the precuneus might be implicated to different  
474 extents across participants in subserving meta-memory assessment in face of the acute TMS  
475 disruption.

476 In affirmation of this notion, we revealed that individuals with higher functional  
477 connectivity between the precuneus and the hippocampus, or smaller GM volume/density in  
478 the precuneus, tend to exhibit higher vulnerability in metacognitive ability under the impact  
479 of TMS. By indexing the strength of functional connectivity between the precuneus and the  
480 hippocampus, we showed that subjects with higher functional connectivity were more  
481 vulnerable to the inhibitory TMS effect. Since the hippocampus is crucial for temporal order  
482 memory judgement [35] and is known to modulate the neural activity of confidence  
483 judgments [19], we propose that the precuneus might act as an accumulator [36] for the  
484 strength of evidence received from hippocampus, which was also utilized to support meta-  
485 mnemonic/meta-awareness appraisal. Although how the information is concurrently  
486 transformed for meta-memory processing is still unknown, our results indicate that this  
487 “meta-mnemonic” accumulator during memory retrieval was dependent on its functional  
488 connectivity with the hippocampus. In fact, neuroimaging with pharmacological intervention  
489 on the monkeys has delineated a meta-memory stream consisting of information flow  
490 extracted from the hippocampus, going through the intraparietal cortex and then read-out by  
491 the prefrontal area 9 [25, 33]. Using high-resolution multi-parameter mapping, researchers  
492 also found that markers of myelination and iron content in the hippocampus correlate with  
493 metacognitive ability across individuals [2]. Altogether, these may help account for the  
494 neuromodulatory effects by TMS being dependent on individuals’ functional connectivity  
495 between the precuneus and the hippocampus.

496 We further revealed that the changes in metacognitive efficiency following TMS were  
497 determined by the GM volume/density in the precuneus. Specifically, our participants with a  
498 smaller volume/density in precuneus tend to have higher vulnerability in metacognitive ability  
499 to TMS, whereas those with a bigger volume/density in this region tend to be more immune to

500 the TMS impact. The correlational relationship between precuneal volume and meta-memory  
501 capability has been previously established during a verbal memory task [3]. Here, in light of  
502 the findings that the posterior parietal cortex contains two sub-groups of neurons that are  
503 differentially responsive for memory versus confidence demands during memory retrieval  
504 [15], our revelation that the precuneal density/volume is a robust predictor for individuals'  
505 susceptibility might thus align with the possibility that participants with a bigger/denser  
506 precuneus might have a larger “missed” portion of the precuneus that can remain functional to  
507 serve to faithfully code the confidence-related signals.

## 508 **Conclusions**

509 Taken both functional and anatomical evidence together, our study capitalized on  
510 individual variability to characterize the neuromodulatory effects of TMS during meta-  
511 mnemonic appraisal. Through several neuroimaging modalities, we provided compelling  
512 evidence in outlining a possible circuit encompassing the precuneus and its mnemonic  
513 midbrain neighbor the hippocampus at the service of realizing our meta-awareness upon  
514 memory recollection of episodic details.

515 **Acknowledgements.** We thank Elena Makovac for her advice on implementing VBM  
516 analysis. The authors declare no competing financial interests.

517 **Funding.** This work was supported by Ministry of Education of PRC Humanities and Social  
518 Sciences Research grant 16YJC190006, STCSM Shanghai Pujiang Program 16PJ1402800,  
519 STCSM Natural Science Foundation of Shanghai 16ZR1410200, NYU Shanghai and NYU-  
520 ECNU Institute of Brain and Cognitive Science at NYU Shanghai (S.C.K.); National Institute  
521 of Neurological Disorders and Stroke of the National Institutes of Health grant R01NS088628  
522 (H.L.); National Natural Science Foundation of China 31371052 (Y.H.).

523

524 **References**

- 525 [1] Fleming SM, Weil RS, Nagy Z, Dolan RJ, Rees G. Relating introspective accuracy to  
526 individual differences in brain structure. *Science* 2010;329(5998):1541-3.
- 527 [2] Allen M, Glen JC, Mullensiefen D, Schwarzkopf DS, Fardo F, Frank D, et al. Metacognitive  
528 ability correlates with hippocampal and prefrontal microstructure. *Neuroimage* 2017;149:415-23.
- 529 [3] McCurdy LY, Maniscalco B, Metcalfe J, Liu KY, de Lange FP, Lau H. Anatomical coupling  
530 between distinct metacognitive systems for memory and visual perception. *J Neurosci*  
531 2013;33(5):1897-906.
- 532 [4] Fleming SM, Huijgen J, Dolan RJ. Prefrontal contributions to metacognition in perceptual  
533 decision making. *J Neurosci* 2012;32(18):6117-25.
- 534 [5] Hebart MN, Schriever Y, Donner TH, Haynes JD. The relationship between perceptual  
535 decision variables and confidence in the human brain. *Cereb Cortex* 2016;26(1):118-30.
- 536 [6] Morales J, Lau H, Fleming SM. Domain-general and domain-specific patterns of activity  
537 supporting metacognition in human prefrontal cortex. *J Neurosci* 2018;38(14):3534-46.
- 538 [7] Qiu L, Su J, Ni Y, Bai Y, Zhang X, Li X, et al. The neural system of metacognition  
539 accompanying decision-making in the prefrontal cortex. *PLoS biology* 2018;16(4):e2004037.
- 540 [8] Baird B, Smallwood J, Gorgolewski KJ, Margulies DS. Medial and lateral networks in  
541 anterior prefrontal cortex support metacognitive ability for memory and perception. *J Neurosci*  
542 2013;33(42):16657-65.
- 543 [9] Kepecs A, Uchida N, Zariwala HA, Mainen ZF. Neural correlates, computation and  
544 behavioural impact of decision confidence. *Nature* 2008;455(7210):227-31.
- 545 [10] Middlebrooks PG, Sommer MA. Neuronal correlates of metacognition in primate frontal  
546 cortex. *Neuron* 2012;75(3):517-30.
- 547 [11] Fleming SM, Ryu J, Golfinos JG, Blackmon KE. Domain-specific impairment in  
548 metacognitive accuracy following anterior prefrontal lesions. *Brain* 2014;137(Pt 10):2811-22.
- 549 [12] Rounis E, Maniscalco B, Rothwell JC, Passingham RE, Lau H. Theta-burst transcranial  
550 magnetic stimulation to the prefrontal cortex impairs metacognitive visual awareness. *Cogn Neurosci*  
551 2010;1(3):165-75.
- 552 [13] Shekhar M, Rahnev D. Distinguishing the roles of dorsolateral and anterior PFC in visual  
553 metacognition. *J Neurosci* 2018;38(22):5078-87.



- 554 [14] Fleming SM, Lau HC. How to measure metacognition. *Front Hum Neurosci* 2014;8:443.
- 555 [15] Rutishauser U, Aflalo T, Rosario ER, Pouratian N, Andersen RA. Single-neuron  
556 representation of memory strength and recognition confidence in left human posterior parietal cortex.  
557 *Neuron* 2018;97(1):209-20 e3.
- 558 [16] Simons JS, Peers PV, Mazuz YS, Berryhill ME, Olson IR. Dissociation between memory  
559 accuracy and memory confidence following bilateral parietal lesions. *Cereb Cortex* 2010;20(2):479-85.
- 560 [17] Ciaramelli E, Faggi G, Scarpazza C, Mattioli F, Spaniol J, Ghetti S, et al. Subjective  
561 recollection independent from multifeatureal context retrieval following damage to the posterior parietal  
562 cortex. *Cortex* 2017;91:114-25.
- 563 [18] Ye Q, Zou F, Lau H, Hu Y, Kwok SC. Causal evidence for mnemonic metacognition in  
564 human precuneus. *J Neurosci* 2018;38(28):6379-87.
- 565 [19] Chua EF, Schacter DL, Rand-Giovannetti E, Sperling RA. Understanding metamemory:  
566 neural correlates of the cognitive process and subjective level of confidence in recognition memory.  
567 *Neuroimage* 2006;29(4):1150-60.
- 568 [20] Wang JX, Rogers LM, Gross EZ, Ryals AJ, Dokucu ME, Brandstatt KL, et al. Targeted  
569 enhancement of cortical-hippocampal brain networks and associative memory. *Science*  
570 2014;345(6200):1054-7.
- 571 [21] Kwok SC, Shallice T, Macaluso E. Functional anatomy of temporal organisation and domain-  
572 specificity of episodic memory retrieval. *Neuropsychologia* 2012;50(12):2943-55.
- 573 [22] Iyer MB, Schleper N, Wassermann EM. Priming stimulation enhances the depressant effect of  
574 low-frequency repetitive transcranial magnetic stimulation. *J Neurosci* 2003;23(34):10867-72.
- 575 [23] Rossini PM, Burke D, Chen R, Cohen LG, Daskalakis Z, Di Iorio R, et al. Non-invasive  
576 electrical and magnetic stimulation of the brain, spinal cord, roots and peripheral nerves: Basic  
577 principles and procedures for routine clinical and research application. An updated report from an  
578 I.F.C.N. Committee. *Clinical neurophysiology : official journal of the International Federation of*  
579 *Clinical Neurophysiology* 2015;126(6):1071-107.
- 580 [24] Maniscalco B, Lau H. A signal detection theoretic approach for estimating metacognitive  
581 sensitivity from confidence ratings. *Conscious Cogn* 2012;21(1):422-30.
- 582 [25] Miyamoto K, Osada T, Setsuie R, Takeda M, Tamura K, Adachi Y, et al. Causal neural  
583 network of metamemory for retrospection in primates. *Science* 2017;355(6321):188-93.

- 584 [26] Talairach J, Tournoux P. Co-planar stereotaxic atlas of the human brain. 3-Dimensional  
585 proportional system: an approach to cerebral imaging. Thieme; 1988.
- 586 [27] Esteban O, Markiewicz C, Blair RW, Moodie C, Isik AI, Erramuzpe Aliaga A, et al.  
587 FMRIPrep: a robust preprocessing pipeline for functional MRI. bioRxiv 2018.
- 588 [28] Gorgolewski K, Burns CD, Madison C, Clark D, Halchenko YO, Waskom ML, et al. Nipype:  
589 a flexible, lightweight and extensible neuroimaging data processing framework in python. Front  
590 Neuroinform 2011;5:13.
- 591 [29] Tustison NJ, Avants BB, Cook PA, Zheng Y, Egan A, Yushkevich PA, et al. N4ITK:  
592 improved N3 bias correction. IEEE transactions on medical imaging 2010;29(6):1310-20.
- 593 [30] Pruim RHR, Mennes M, van Rooij D, Llera A, Buitelaar JK, Beckmann CF. ICA-AROMA: A  
594 robust ICA-based strategy for removing motion artifacts from fMRI data. Neuroimage 2015;112:267-  
595 77.
- 596 [31] Rubinov M, Sporns O. Complex network measures of brain connectivity: uses and  
597 interpretations. Neuroimage 2010;52(3):1059-69.
- 598 [32] Ashburner J. A fast diffeomorphic image registration algorithm. Neuroimage 2007;38(1):95-  
599 113.
- 600 [33] Miyamoto K, Setsuie R, Osada T, Miyashita Y. Reversible silencing of the frontopolar cortex  
601 selectively impairs metacognitive judgment on non-experience in primates. Neuron 2018;97(4):980-9  
602 e6.
- 603 [34] Wynn SC, Hendriks MPH, Daselaar SM, Kessels RPC, Schutter D. The posterior parietal  
604 cortex and subjectively perceived confidence during memory retrieval. Learn Mem 2018;25(8):382-9.
- 605 [35] Davachi L, DuBrow S. How the hippocampus preserves order: the role of prediction and  
606 context. Trends Cogn Sci 2015;19(2):92-9.
- 607 [36] Wagner AD, Shannon BJ, Kahn I, Buckner RL. Parietal lobe contributions to episodic  
608 memory retrieval. Trends Cogn Sci 2005;9(9):445-53.
- 609
